# Supplementary material for: Multi-omics analysis reveals molecular mechanisms of shoot adaption to salt stress in Tibetan wild barley
Source: PubMed Central journal article supplement (PMC5100661; doi:10.1186/s12864-016-3242-9), 2016-11-07
Supplement: 12864_2016_3242_MOESM1_ESM.pdf [file 12864_2016_3242_MOESM1_ESM.pdf]

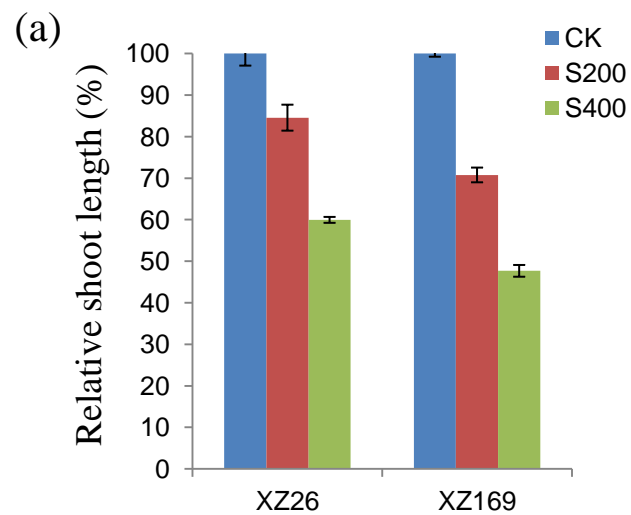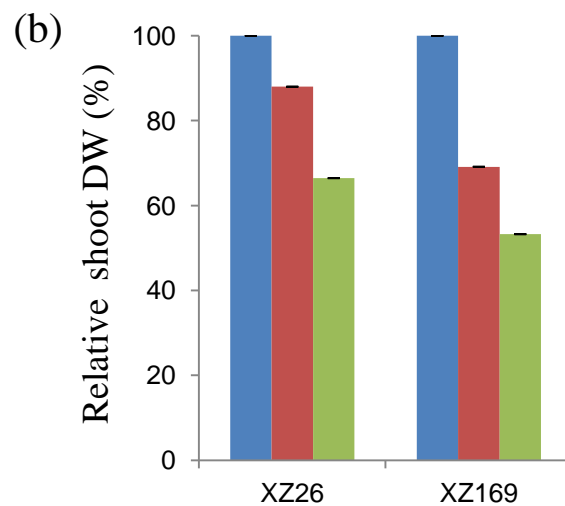

**Additional files 1: Fig. 1.** Relative shoot length and shoot dry weight of Tibetan wild barley genotypes (XZ26 and XZ169) after moderate (200 mM, S200) and high (400 mM, S400) salinity.
