# Supplementary material for: Multi-omics analysis reveals molecular mechanisms of shoot adaption to salt stress in Tibetan wild barley
Source: PubMed Central journal article supplement (PMC5100661; doi:10.1186/s12864-016-3242-9), 2016-11-07
Supplement: 12864_2016_3242_MOESM4_ESM.pdf [file 12864_2016_3242_MOESM4_ESM.pdf]

XZ26

XZ169

S200/CK

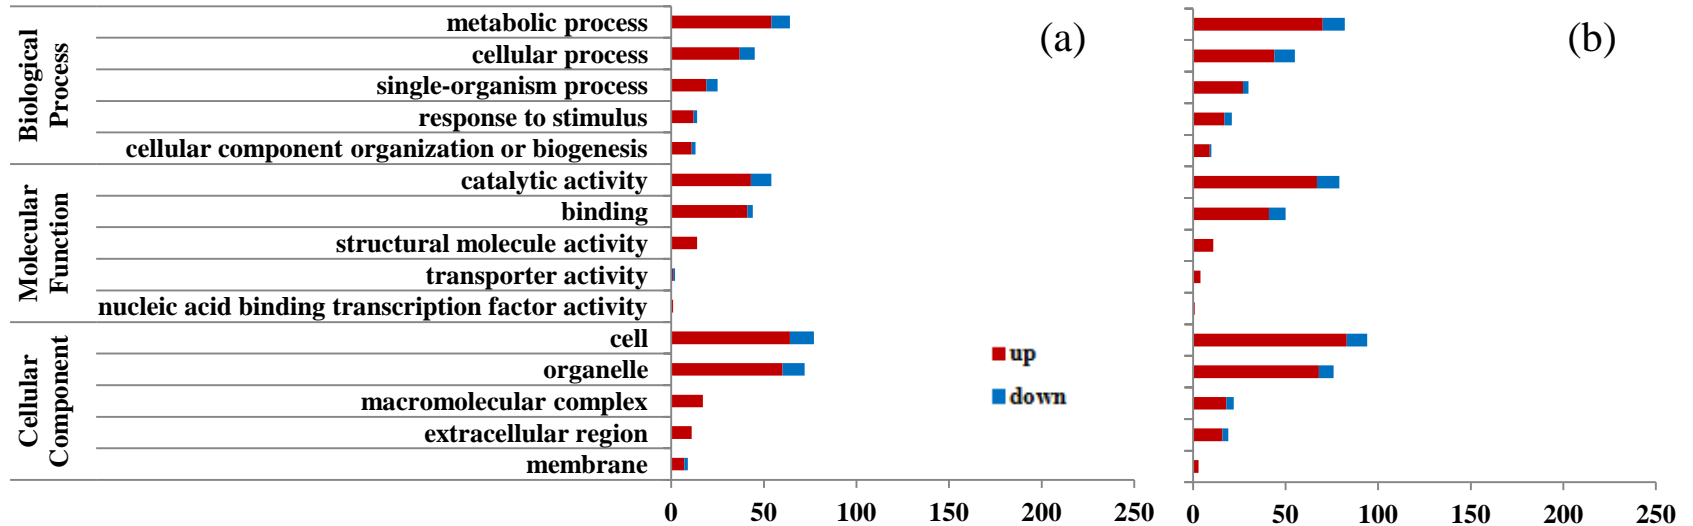

S400/CK

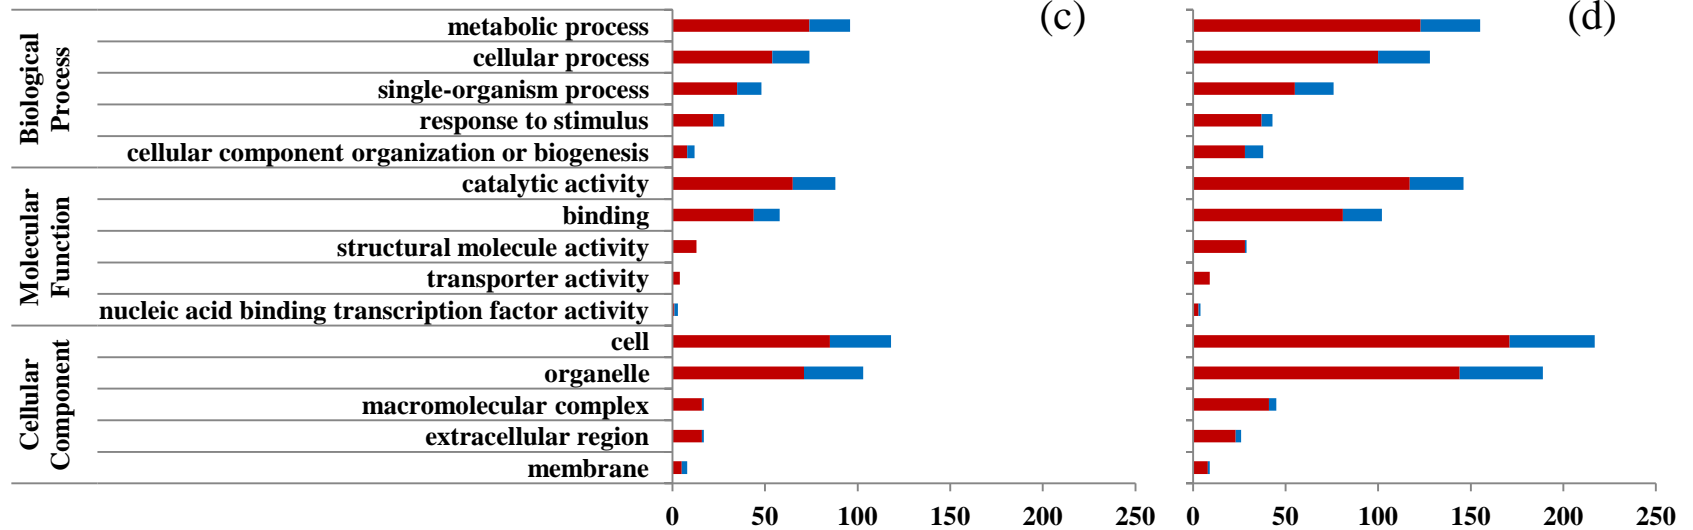

Numbers of differentially expressed proteins

**Additional files 3: Fig. 3.** Gene Ontology (GO) classification of the differentially accumulated proteins in the shoots of XZ26 and XZ169 after moderate (S200) and high (S400) salt treatments.
